# Supplementary material for: Whole-genome resequencing of Japanese whiting (Sillago japonica) provide insights into local adaptations
Source: PubMed Central journal article supplement — Zool Res. 2021 Sep 18;42(5):548–61. doi: 10.24272/j.issn.2095-8137.2021.116 (PMC8455465; doi:10.24272/j.issn.2095-8137.2021.116), 2021-09-18
Supplement: zr-42-5-548-S1.pdf [file zr-42-5-548-S1.pdf]

## Supplementary Materials

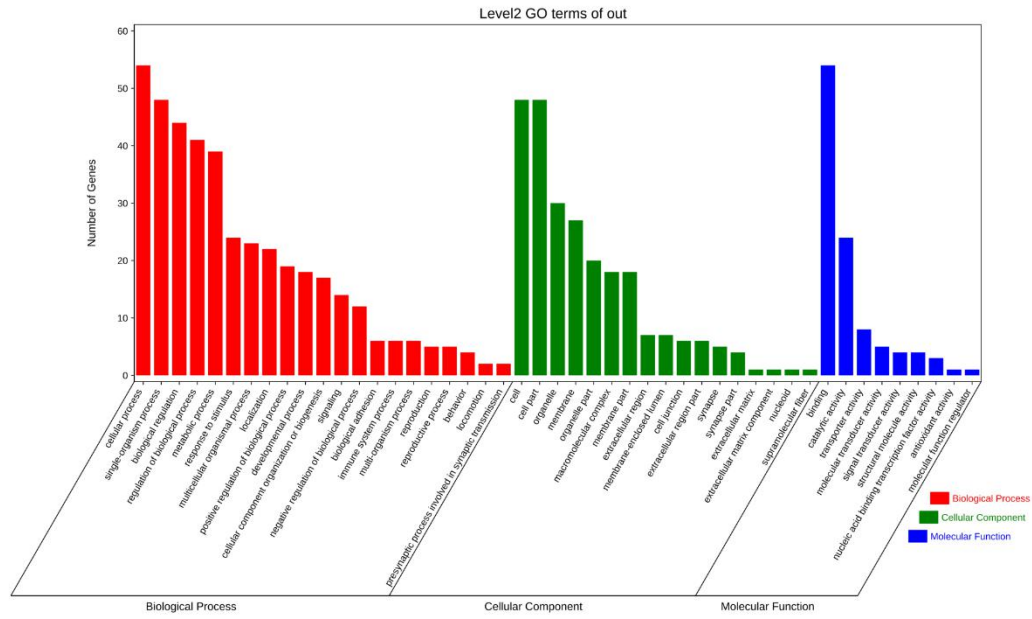

Supplementary Figure S1 GO secondary node annotation classification of cold-temperature adaptation genes

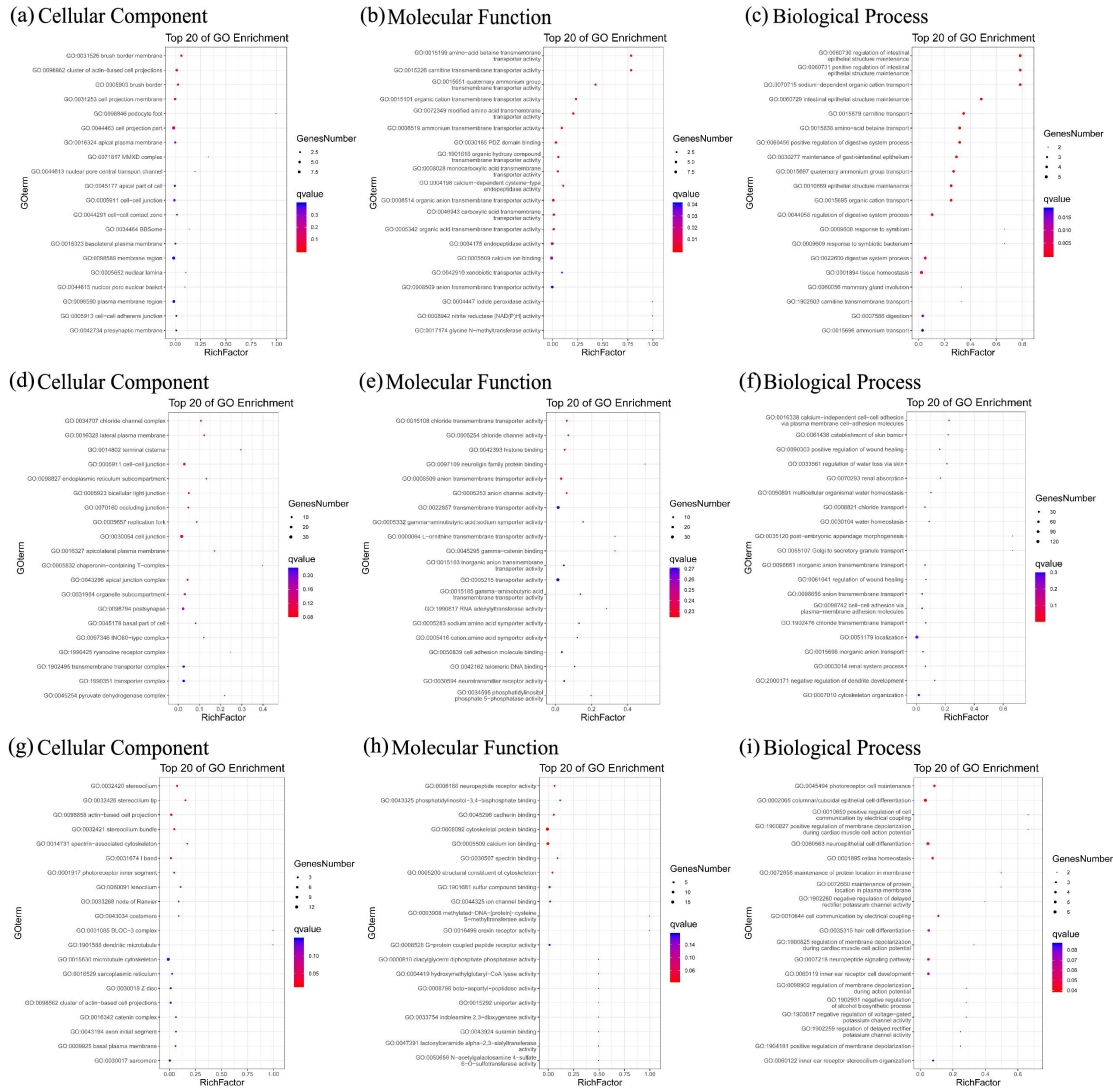

Supplementary Figure S2 Top 20 enriched GO terms for candidate genes. (a–c, cold-temperature adaptation genes; d–f, high-temperature adaptation genes; g–i, warm-temperature adaptation genes).

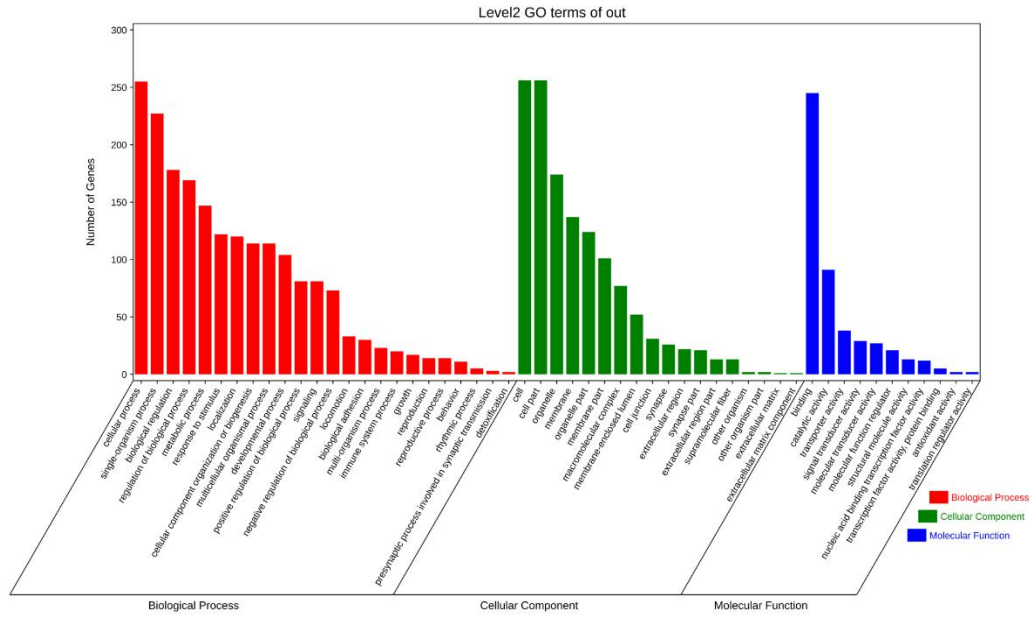

Supplementary Figure S3 GO secondary node annotation classification of high-temperature adaptation genes.

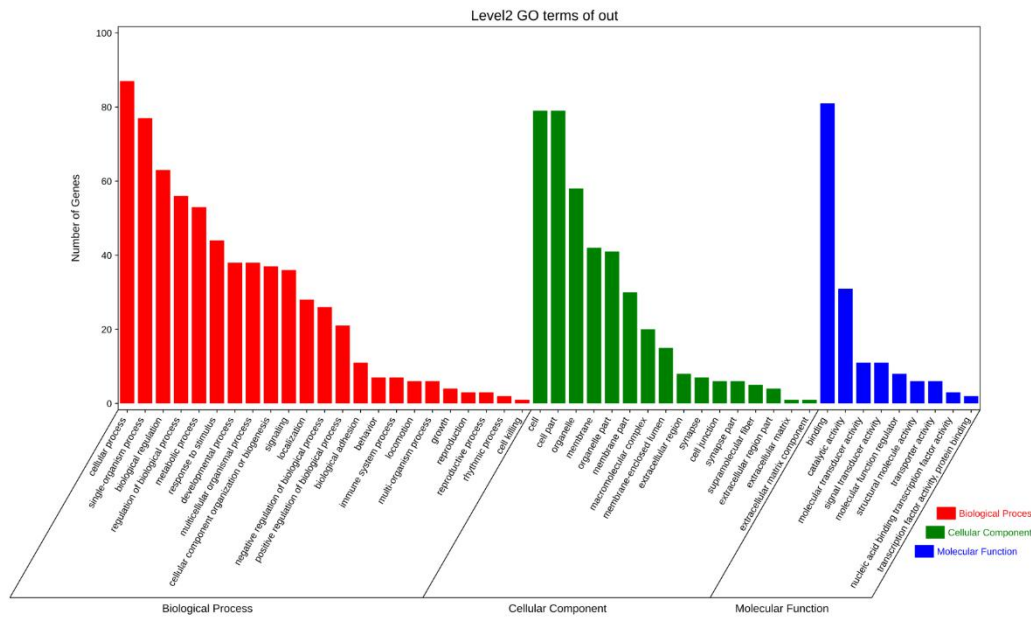

Supplementary Figure S4 GO secondary node annotation classification of warm-temperature adaptation genes.

## **Supplementary Tables**

Supplementary Table S1 Statistics of whole-genome sequencing data

Supplementary Table S2 Sequencing depth and coverage statistics

Supplementary Table S3 SNP summary statistics in *Sillago japonica*

Supplementary Table S4 List of cold-temperature adaptation genes and related annotation information

Supplementary Table S5 List of warm-temperature adaptation genes and related annotation information

Supplementary Table S6 KEGG enrichment analysis of cold-temperature adaptation genes

Supplementary Table S7 GO enrichment analysis of cold-temperature adaptation genes

Supplementary Table S8 GO enrichment analysis of warm-temperature adaptation genes

Supplementary Table S9 KEGG enrichment analysis of warm-temperature adaptation genes

Supplementary Table S10 GO enrichment analysis of high-temperature adaptation genes (Only show significant and top 20 GO terms )

Supplementary Table S11 GO enrichment analysis of warm-adaptation genes (Only show significant and top 20 GO terms )

Supplementary Table S12 KEGG enrichment analysis of warm-temperature adaptation genes

Supplementary Tables S1–S12 are listed as a separate file due to their large size.
